# Supplementary material
Source: HighWire-hosted journal article supplement (https://bmjopen.bmj.com/content/10/2/e031612)
Supplement: inline-supplementary-material-3 [file inline-supplementary-material-3.pdf]

SUPPLEMENT III

Fear of Weight Gain

Please check the box that best describes how often you worry about each of the following items.

|                                                            | Never                      | Rarely                     | Sometimes                  | Often                      | Almost<br>Always           |
|------------------------------------------------------------|----------------------------|----------------------------|----------------------------|----------------------------|----------------------------|
| 1. I worry about gaining weight                            | <input type="checkbox"/> 0 | <input type="checkbox"/> 1 | <input type="checkbox"/> 3 | <input type="checkbox"/> 3 | <input type="checkbox"/> 4 |
| 2. I worry that my diabetic treatment makes me gain weight | <input type="checkbox"/> 0 | <input type="checkbox"/> 1 | <input type="checkbox"/> 3 | <input type="checkbox"/> 3 | <input type="checkbox"/> 4 |
| 3. I worry about not being able to stabilise my weight     | <input type="checkbox"/> 0 | <input type="checkbox"/> 1 | <input type="checkbox"/> 3 | <input type="checkbox"/> 3 | <input type="checkbox"/> 4 |
